# Supplementary material for: Ordered mesoporous organic–inorganic hybrid materials containing microporous functional calix[8]arene amides
Source: Royal Society of Chemistry journal article supplement (doi:10.1039/b307721g), 2003-01-01
Supplement: b307721g.doc [file b307721g.doc]

Electronic Supplementary Information

Ordered mesoporous organic-inorganic hybrid materials containing microporous functional calix[8]arene amides

Chunqing Liu, Nathaniel Naismith, Lei Fu, and James Economy


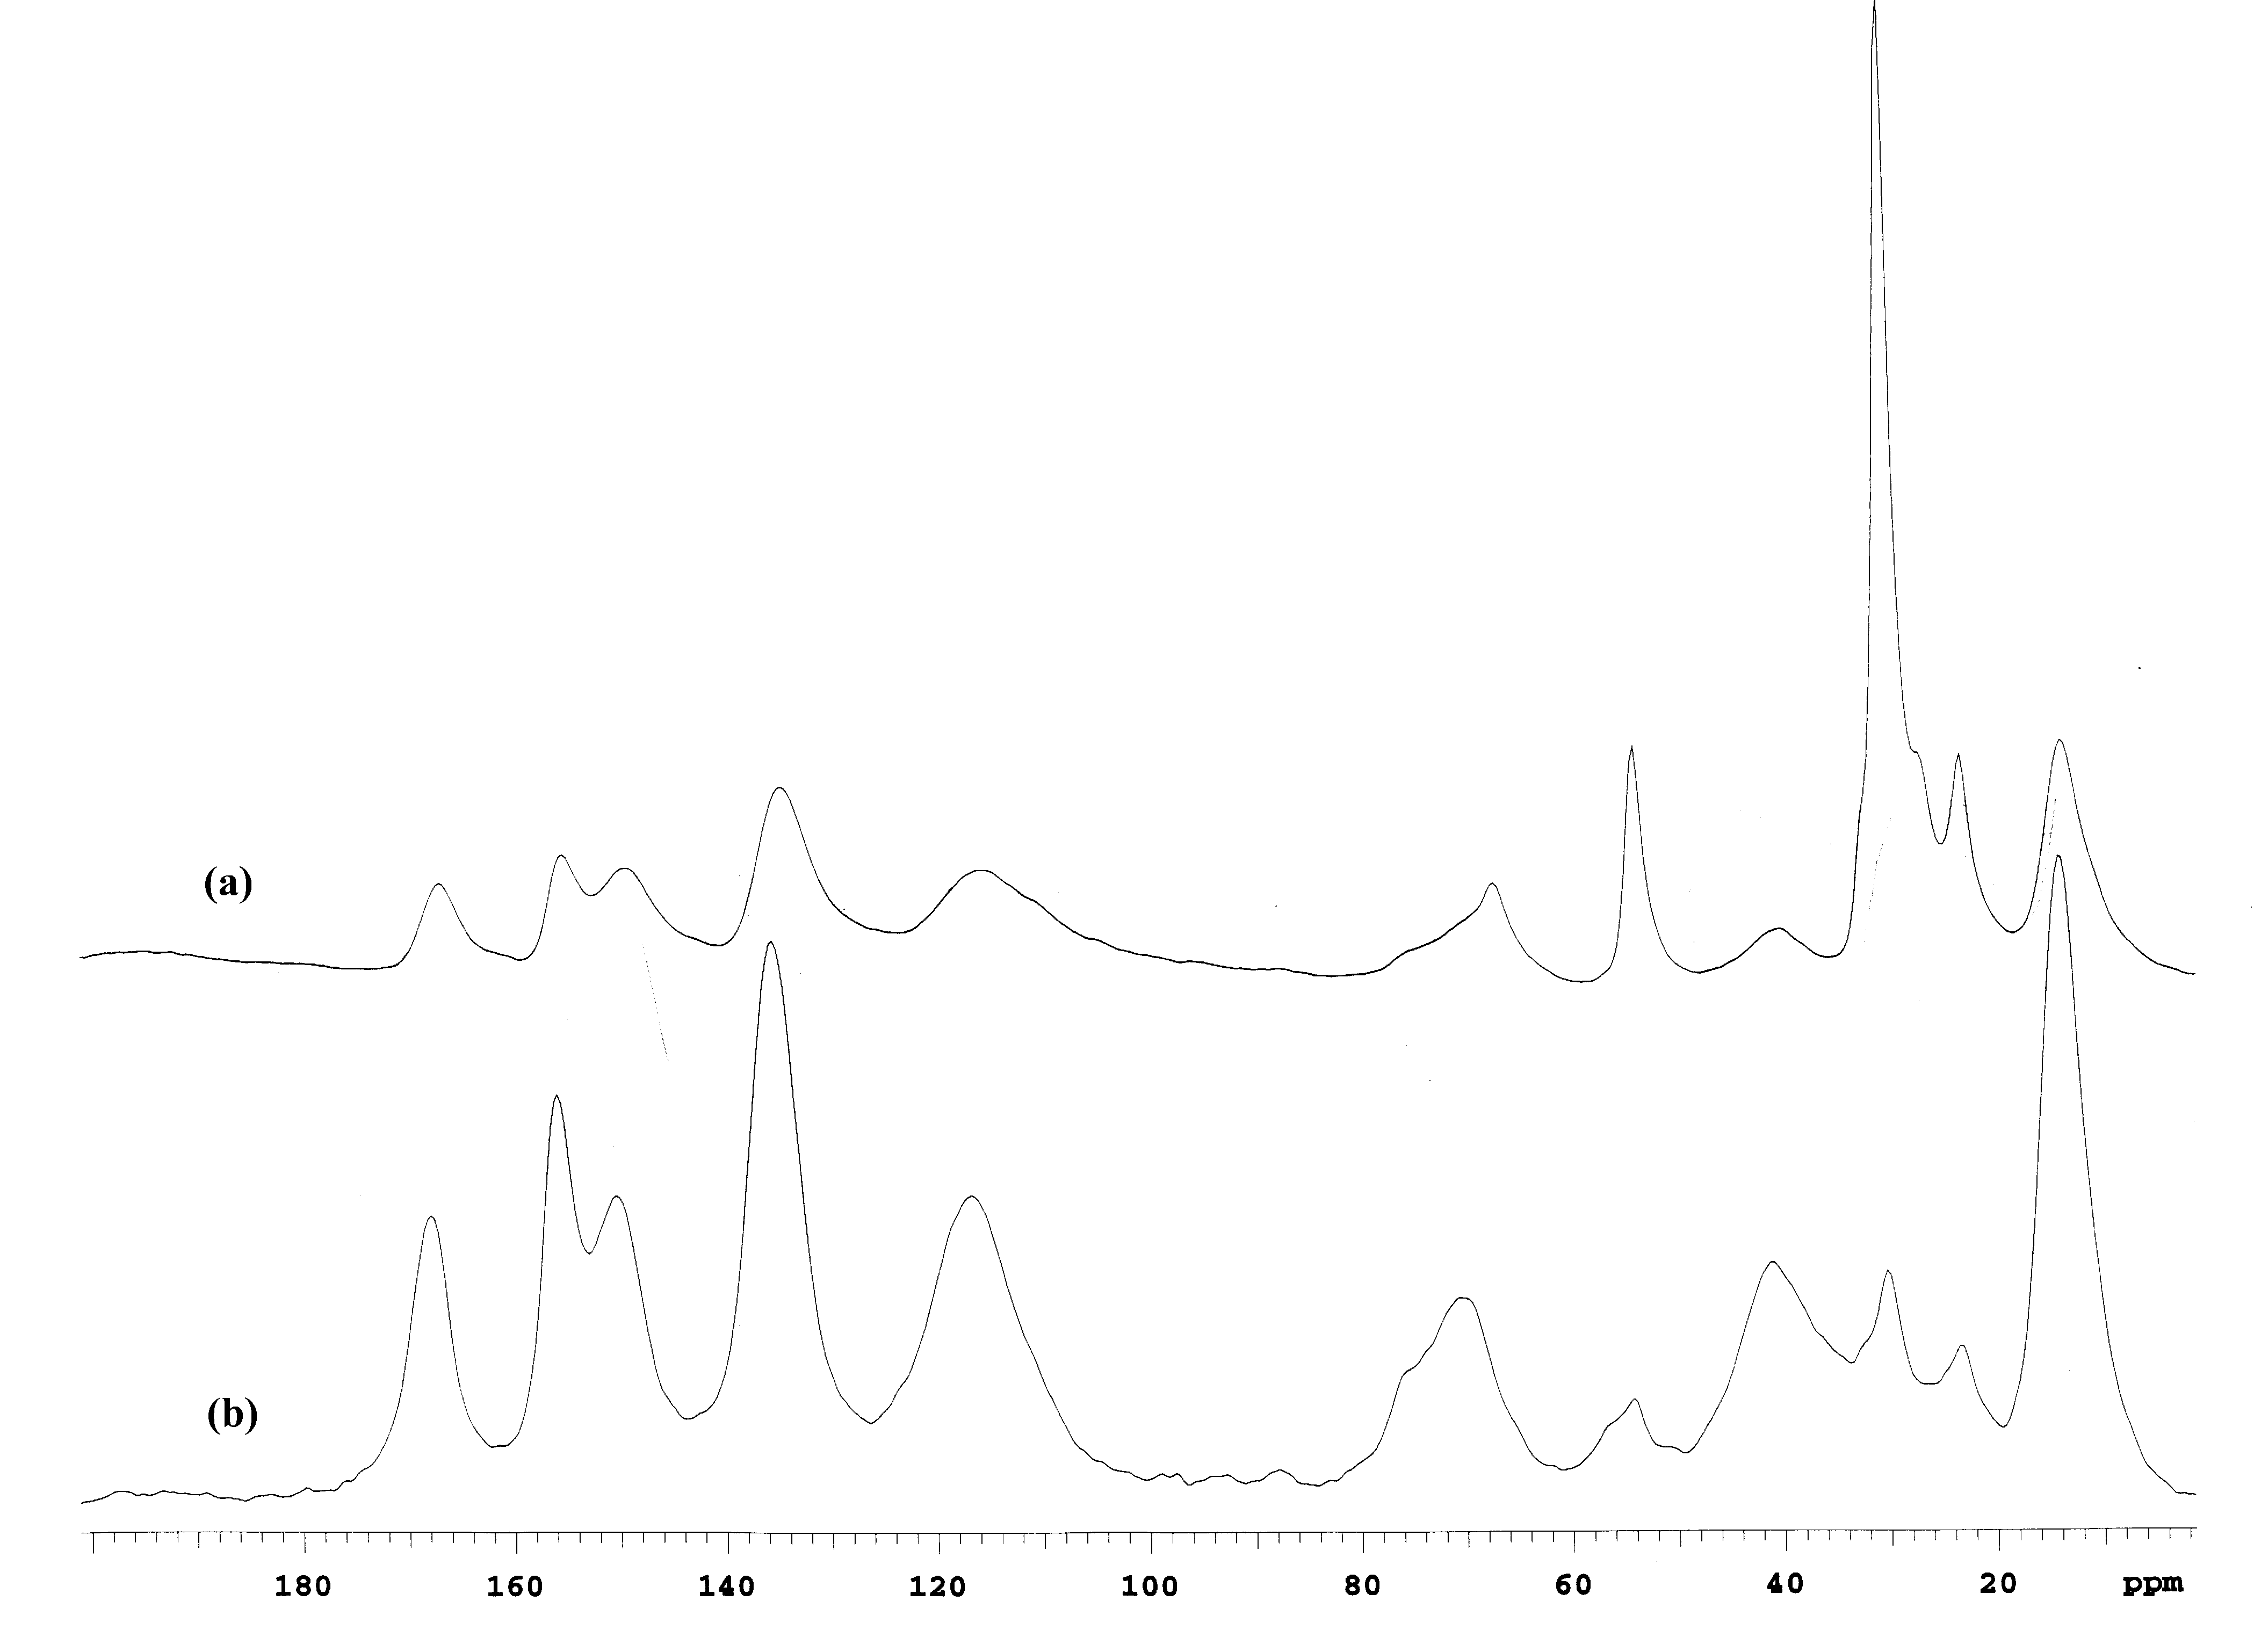


Supporting **Fig. 1** Solid-state 13C NMR spectra of (a) as-synthesized and (b) surfactant-extracted **CX-8-2%** materials.

Supporting **Fig. 2** Powder X-ray diffraction patterns of the as-synthesized (a) **CX-8-1%**, (b) **CX-8-2%**, (c) **CX-8-4%** and (d) **CX-8-2%** gel materials.
